# Supplementary material for: Effects of orientation and structure on solar radiation interception in Chinese solar greenhouse
Source: PLoS One. 2020 Nov 6;15(11):e0242002. doi: 10.1371/journal.pone.0242002 (PMC7647090; doi:10.1371/journal.pone.0242002)
Supplement: S1 Table — (DOC) [file pone.0242002.s001.doc]

| **Nomenclature** | | | | |
| --- | --- | --- | --- | --- |
| **Symbols** | |  |  | variable radius of the Earth |
|  | vertical distance from point A to the ground (m) | |  | average distance of the Earth from the sun throughout the year |
|  | horizontal distance from point A to the front embankment corner (m) | |  | horizontal distance from point B to the front embankment corner (m) |
|  | constant | |  | atmospheric transparency coefficient |
|  | constant | |  | solar energy captured by the wall (W/m2) |
|  | vertical distance from point B to the ground (m) | |  | solar energy captured by the ground (W/m2) |
|  | solar radiation constant (W/m2) | |  | day of the year |
|  | total solar radiation interceped by the lighting roof (W) | |  | decimal hours on the 24-hour clock |
|  | length of the greenhouse (m) | |  | light transmission loss caused by the opaque materials |
|  | average solar radiation interceped by the lighting roof (W/m2) | |  | light transmission loss caused by the aging of plastic film |
|  | average solar radiation interceped by the lighting roof in sunny day (W/m2) | |  | light transmission loss caused by the dust and water droplets |
|  | average solar radiation interceped by the lighting roof in cloudy day (W/m2) | |  | opening time of the heat preservation quilt (min) |
|  | amount of solar direct radiation on the normal plane (W/m2) | |  | closing time of the heat preservation quilt (min) |
|  | amount of solar diffuse radiation on the normal plane (W/m2) | | **Greek symbols** | |
|  | solar altitude angle (°) | |  | direct light transmittance |
|  | solar azimuth angle (°) | |  | diffuse light transmittance |
|  | cloud cover coefficient | |  | transmittance at the incident angle of |
|  | constant | |  | clean pervious to light material of scattered light transmittance |
|  | constant | |  | solar declination angle (°) |
|  | constant | |  | geographic latitude of the greenhouse (°) |
|  | amount of the clouds | |  | lighting roof angle (°) |
|  | actual distance of the Earth from the sun on a given day | |  | azimuth angle of greenhouse (°) |
